# Supplementary material for: Freezing-induced microplastic degradation in an anoxic Fe(ii)-containing solution: the key role of Fe(iv) and ·OH
Source: Royal Society of Chemistry journal article supplement (doi:10.1039/d3en00290j), 2023-01-01
Supplement: d3en00290j1.pdf [file d3en00290j1.pdf]

## Supplementary Information

### Freezing-induced microplastic degradation in anoxic Fe(II)-containing solution: the key role of Fe(IV) and •OH

Jiaxin Lv,<sup>a</sup> Ruixin Chen<sup>b</sup>, Zhen Wu<sup>a</sup>, Yang Bai<sup>b</sup>, Han Song<sup>a,\*</sup>, Chen Tian<sup>c,d</sup>, Mengye Wang<sup>b,\*</sup>, and  
Zhang Lin<sup>a, c, d</sup>

<sup>a</sup>. School of Environment and Energy, Guangdong Provincial Key Laboratory of Solid Wastes Pollution Control and Recycling, South China University of Technology, Guangzhou, Guangdong 510006, China

<sup>b</sup>. State Key Laboratory of Optoelectronic Materials and Technologies, School of Materials, Sun Yat-Sen University, Guangzhou, 510275 China

<sup>c</sup>. School of Metallurgy and Environment, Central South University, Changsha, 410083, China.

<sup>d</sup>. Chinese National Engineering Research Center for Control & Treatment of Heavy Metal Pollution, Changsha, 410083, China.

\*Correspondence: wangmengye@mail.sysu.edu.cn; hansong023@126.com

#### This PDF file includes:

Figures S1 to S10.

Table S1.

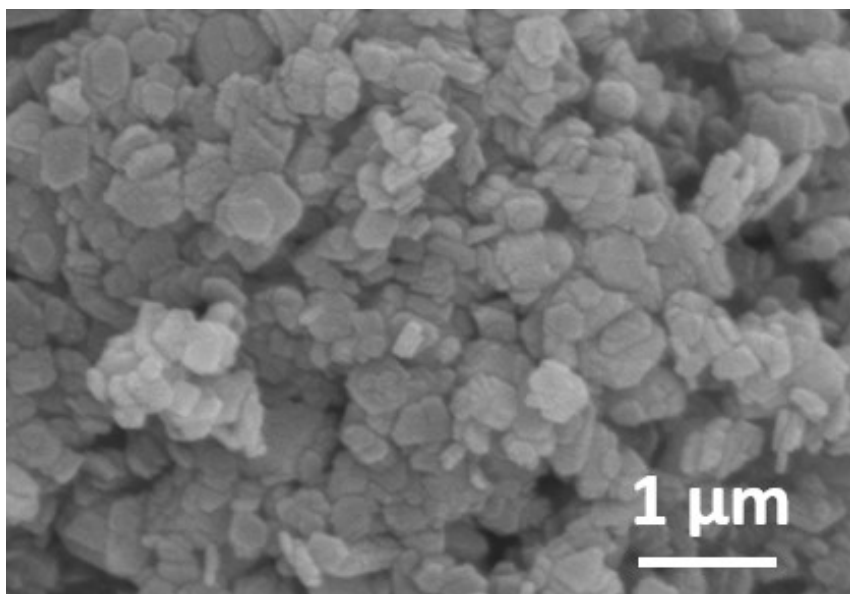

**Fig. S1** SEM image of PS-Fe(II)-I after 12d of reaction.

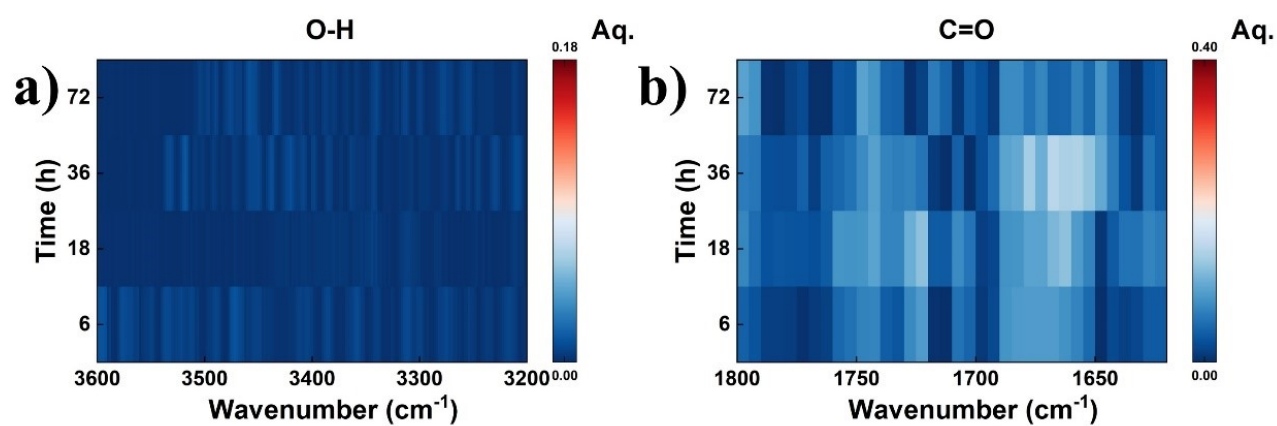

**Fig. S2** Heat mappings of a) -OH and b) C=O functional group analyzed by FT-IR for PS-Fe-I after reaction of 6 h, 18 h, 36 h and 72 h.

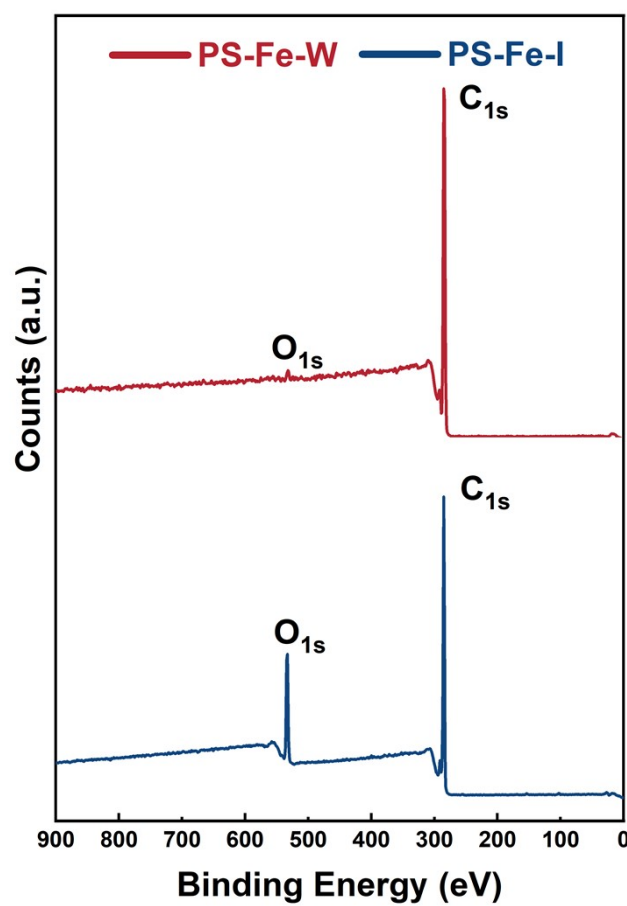

**Fig. S3** XPS spectra of PS-Fe-W and PS-Fe-I after the degradation reaction for 36 h.

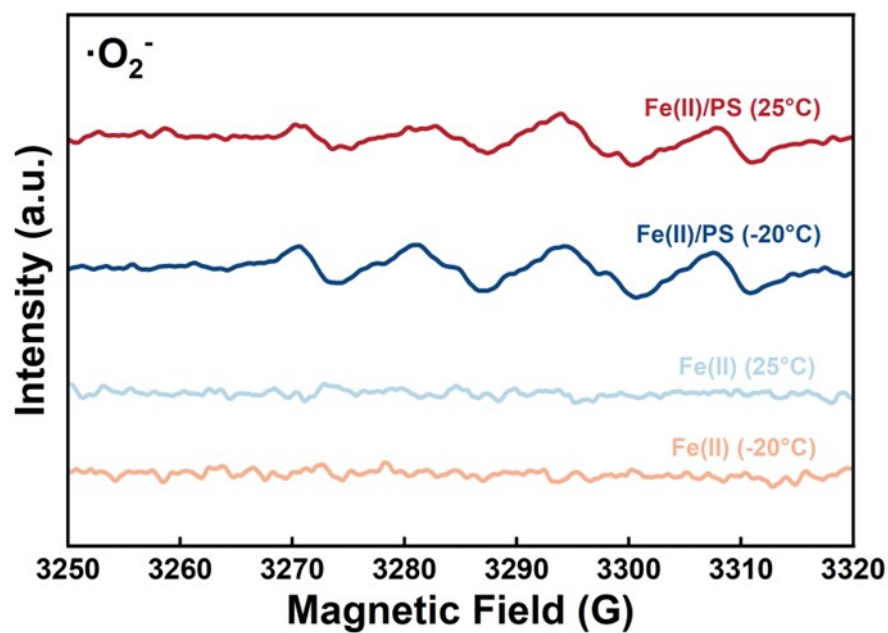

**Fig. S4** EPR spectra of  $\cdot\text{O}_2^-$  in PS frozen ( $-20^\circ\text{C}$ , Fz.) and aqueous ( $25^\circ\text{C}$ , Aq.) Fe (II) solutions after 36 h.  $\text{Fe(II)} = 100\ \mu\text{mol/L}$ ,  $[\text{PS}] = 25\ \text{mg/L}$ .

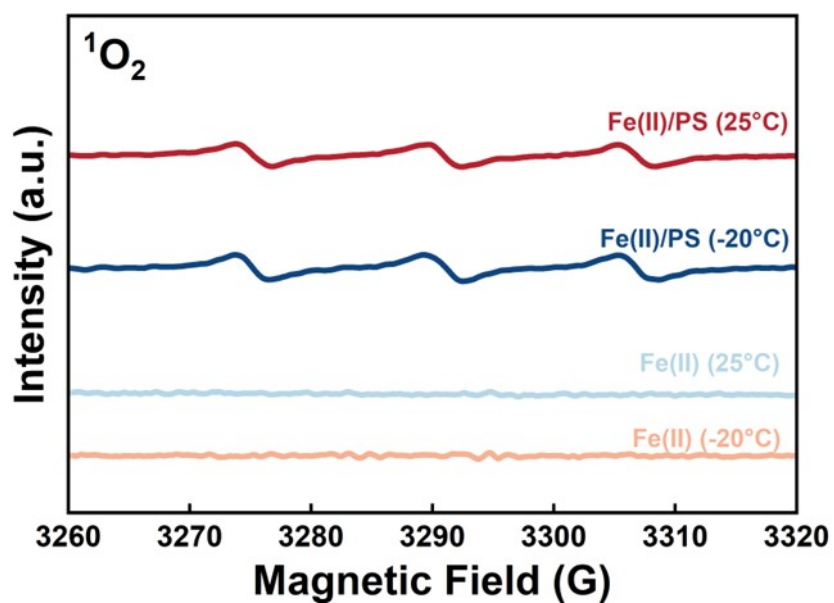

**Fig. S5** EPR spectra of  $^1\text{O}_2$  in PS frozen (-20 °C, Fz.) and aqueous (25 °C, Aq.) Fe(II)-containing solution after 36 h. Fe(II) = 100  $\mu\text{mol/L}$ , [PS] = 25 mg/L.

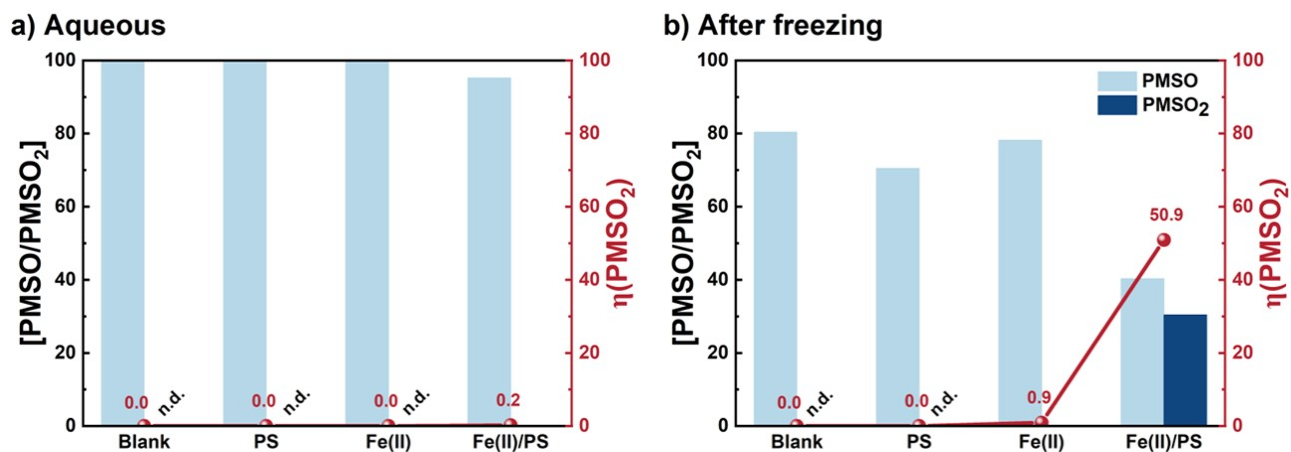

**Fig. S6** PMSO degradation, PMSO<sub>2</sub> formation and  $\eta(\text{PMSO}_2)$  a) before freezing and b) after freezing in a blank, PS solution, Fe(II) solution, Fe(II) and PS solution.  $[\text{Fe(II)}]_0 = [\text{PMSO}]_0 = 100 \mu\text{mol/L}$ ,  $[\text{PS}] = 2.5 \text{ mg/L}$ , freezing temperature =  $-20^\circ\text{C}$ , freezing time = 36h.

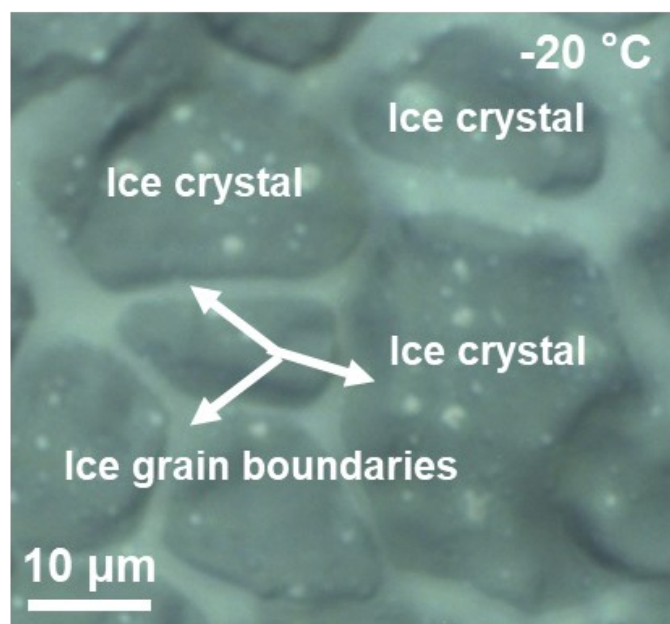

**Fig. S7** Confocal Raman microscopy test of PS-Fe-I at -20°C.



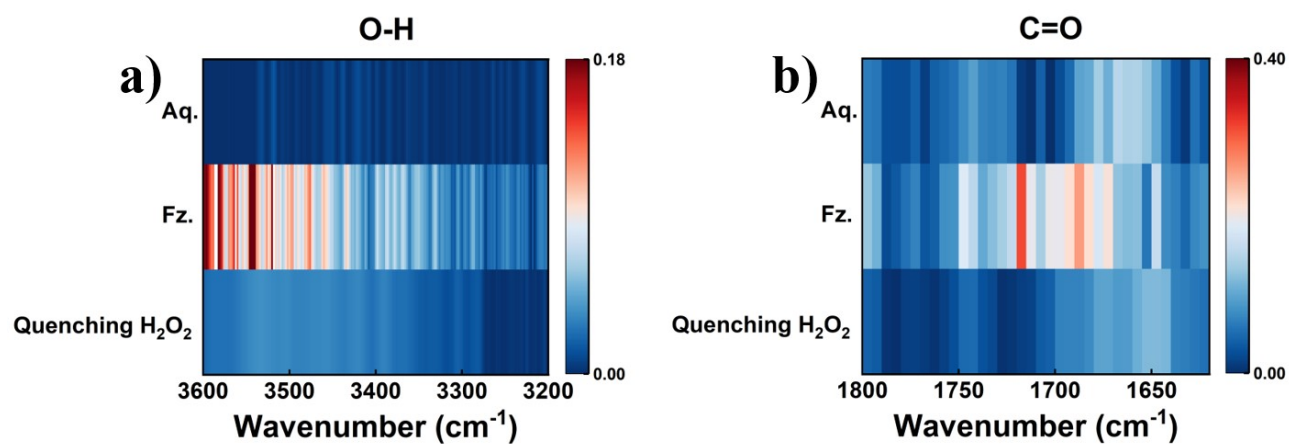

**Fig. S8** Heat mappings of a)  $\text{-OH}$  and b)  $\text{C=O}$  regions in FT-IR spectra by quenching  $\text{H}_2\text{O}_2$  after 36 h degradation in water and frozen ice.

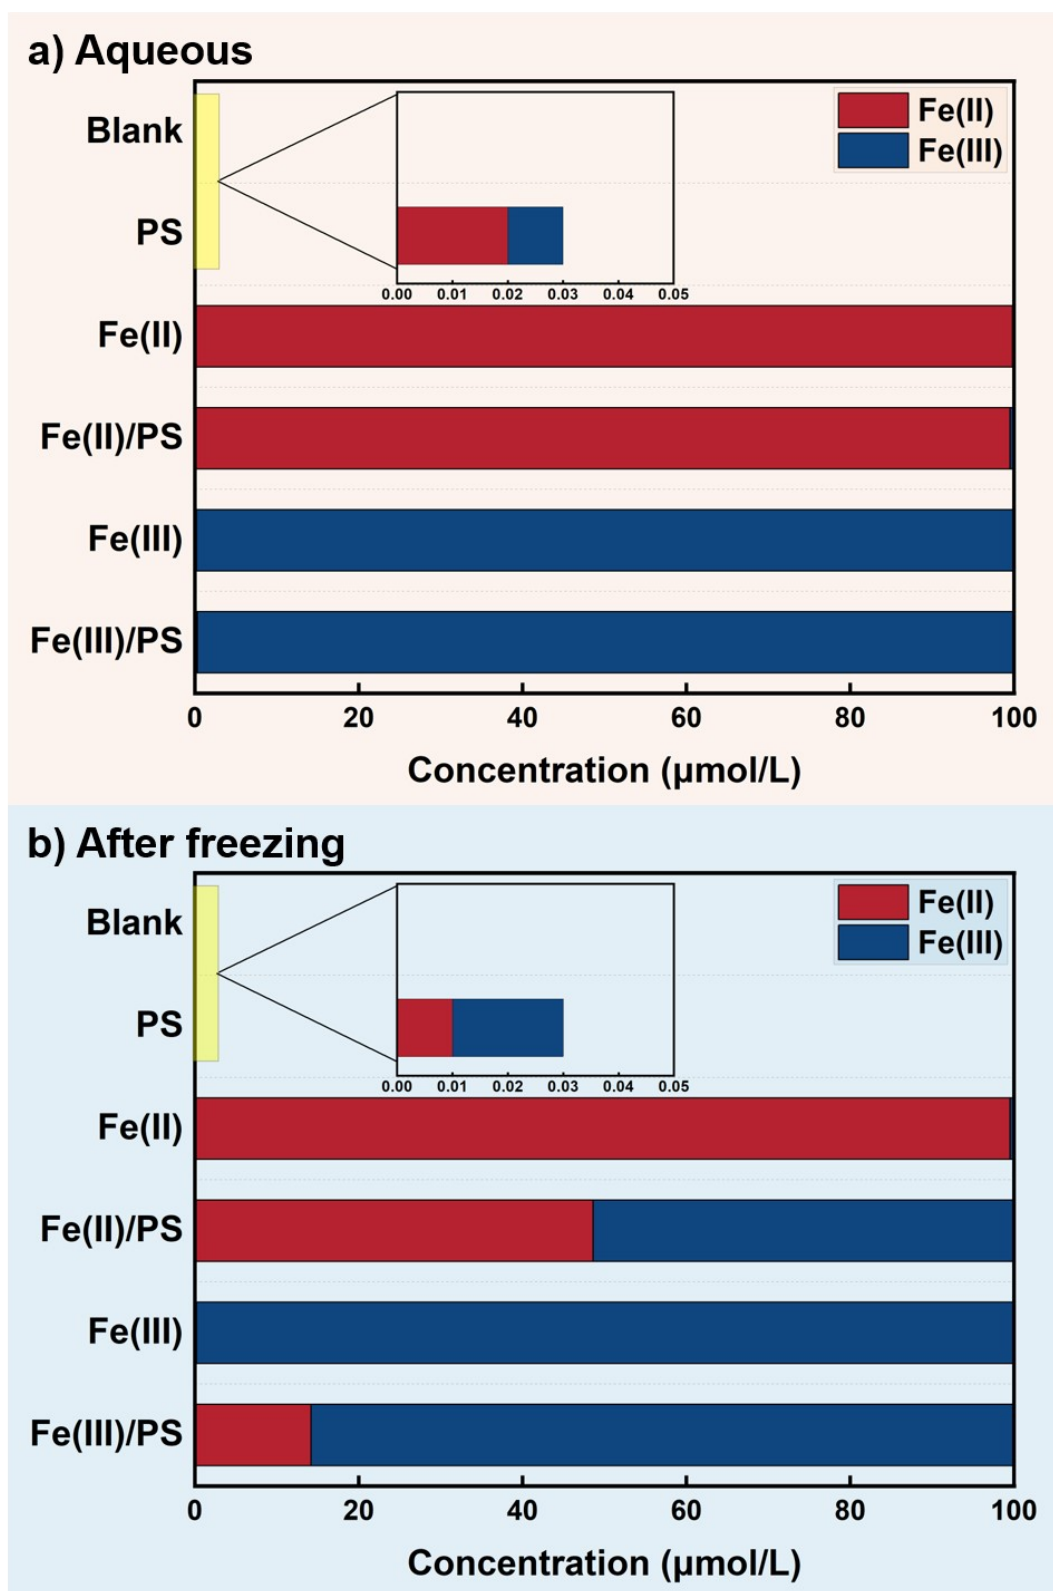

**Fig. S9** The concentration of Fe(II) and Fe(III) a) before freezing and b) after freezing in a blank, PS solution, Fe(II) solution, Fe(II) and PS solution, Fe(III) solution, Fe(III) and PS.  $[\text{Fe(II)}] = [\text{Fe(II)}] = 100 \mu\text{mol/L}$ ,  $[\text{PS}] = 2.5 \text{ mg/L}$ , freezing temperature =  $-20^\circ\text{C}$ , freezing time = 36h.

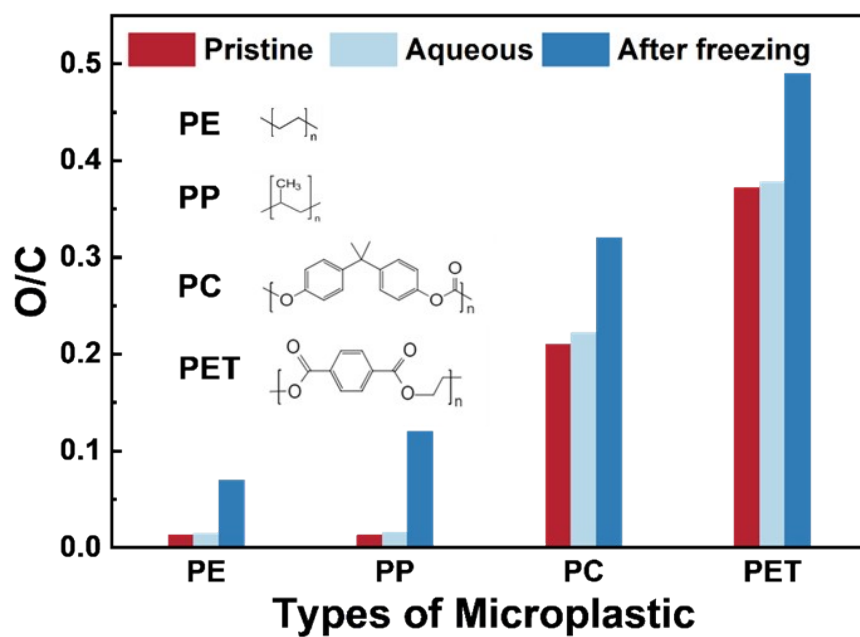

**Fig. S10** Enhanced degradation of freezing polypropylene (PP), Poly ethylene (PE), polycarbonate (PC) and polyethylene terephthalate (PET).

**Table S1** Determination parameters of PMSO and PMSO<sub>2</sub>.

| Organic<br>Contaminant | Mobile Phase |                     | Detection<br>Wavelength<br>(nm) | Flow Rate<br>(mL/min) |
|------------------------|--------------|---------------------|---------------------------------|-----------------------|
|                        | Water<br>(%) | Acetonitrile<br>(%) |                                 |                       |
| PMSO                   | 72           | 28                  | 230                             | 0.13                  |
| PMSO <sub>2</sub>      | 72           | 28                  | 230                             | 0.13                  |
